# Supplementary material
Source: PubMed Central journal article supplement (PMC7453194)
Supplement: 41392_2020_286_MOESM1_ESM.pdf [file 41392_2020_286_MOESM1_ESM.pdf]

## Supplementary Materials for

Human umbilical cord-derived mesenchymal stem cell therapy in patients with COVID-19: a phase 1 clinical trial

Fanping Meng #1, Ruonan Xu #1, Siyu Wang #1, Zhe Xu #1, Chao Zhang<sup>1</sup>, Yuanyuan Li<sup>1</sup>, Tao Yang<sup>1</sup>, Lei Shi<sup>1</sup>, Junliang Fu<sup>1</sup>, Tianjun Jiang<sup>1</sup>, Lei Huang<sup>1</sup>, Peng Zhao<sup>1</sup>, Xin Yuan<sup>1</sup>, Xing Fan<sup>1</sup>, Ji-Yuan Zhang<sup>1</sup>, Jinwen Song<sup>1</sup>, Dawei Zhang<sup>1</sup>, Yanmei Jiao<sup>1</sup>, Limin Liu<sup>1</sup>, Chunbao Zhou<sup>1</sup>, Markus Maeurer<sup>2</sup>, Alimuddin Zumla<sup>3</sup>, Ming Shi <sup>1</sup>, Fu-Sheng Wang <sup>1</sup>

# These authors contributed equally to this work

**Prof. F-S Wang**, Department of Infectious Diseases, Fifth Medical Center of Chinese PLA General Hospital, Beijing 100039, China.

Email: [fswang302@163.com](mailto:fswang302@163.com)

**Prof. M Shi**, Department of Infectious Diseases, Fifth Medical Center of Chinese PLA General Hospital, Beijing 100039, China.

Email: [shiming302@sina.com](mailto:shiming302@sina.com)

### **This PDF file includes:**

Figures. S1 to S4  
Table S1

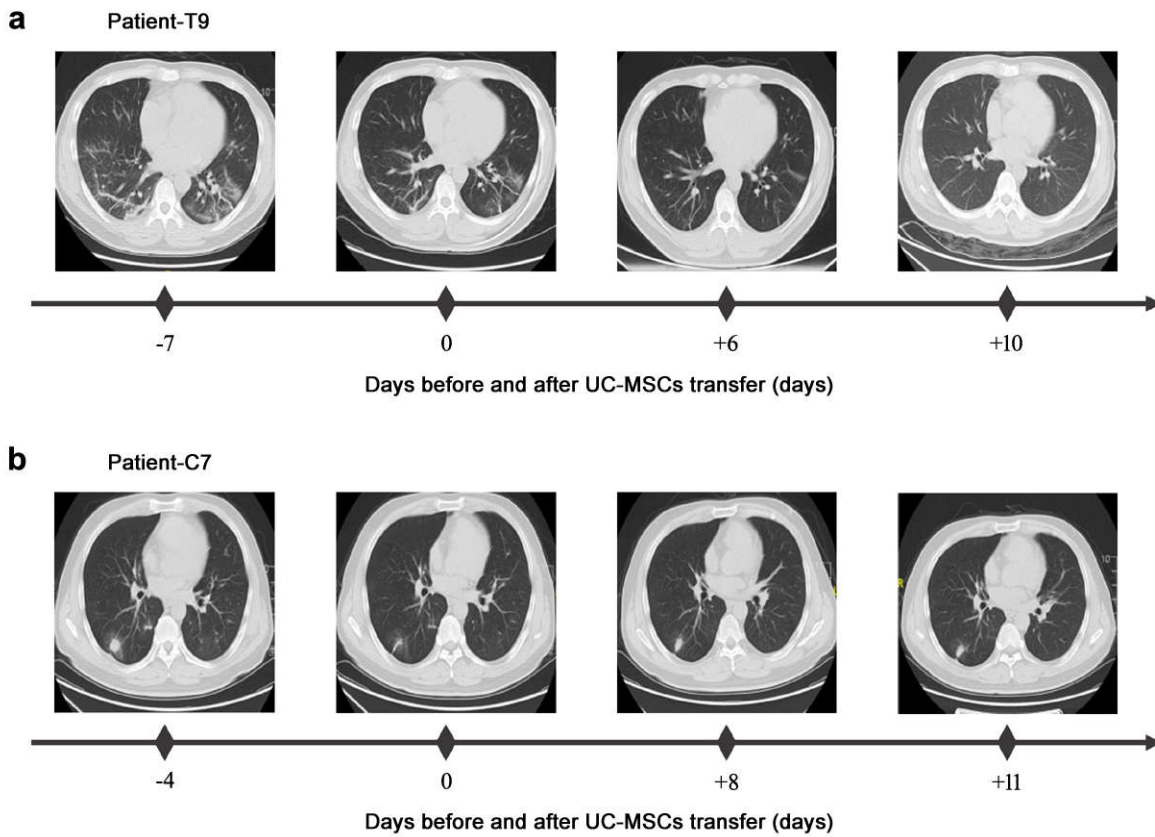

**Figure. S1.**

Representative chest computer tomography for the patients with COVID-19 with/without UC-MSCs transfusion.

**a** Representative chest CT scan images of severe patient 9 after UC-MSCs transfusion.

**b** Representative chest CT scan images of severe patient 7 in the control group.

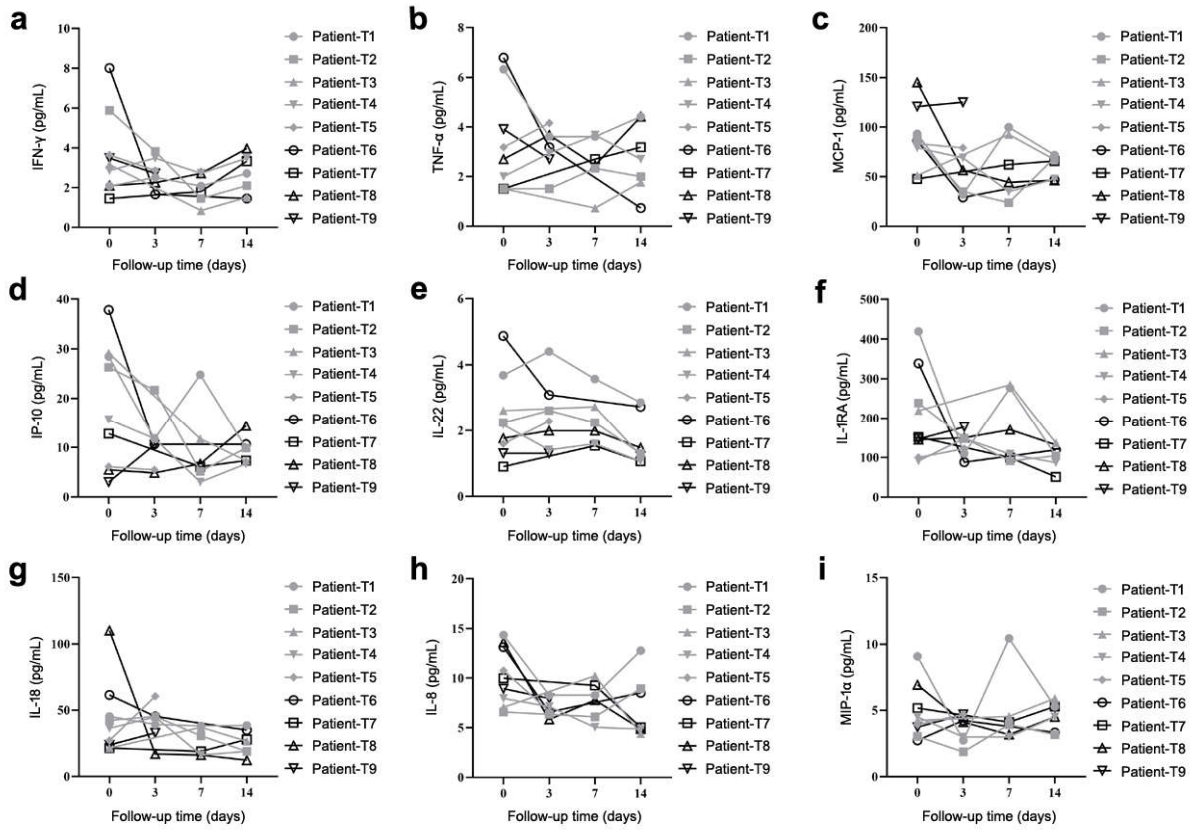

**Figure. S2.**

The dynamics of inflammatory cytokines in the UC-MSCs treatment group.

**a-i** The dynamics of plasma inflammatory cytokines within 14 days after UC-MSCs transfer are shown, including IL-6, IFN- $\gamma$ , TNF- $\alpha$ , MCP-1, IP-10, IL-22, IL-IRA, IL-18, IL-8, and MIP-1 $\alpha$ .

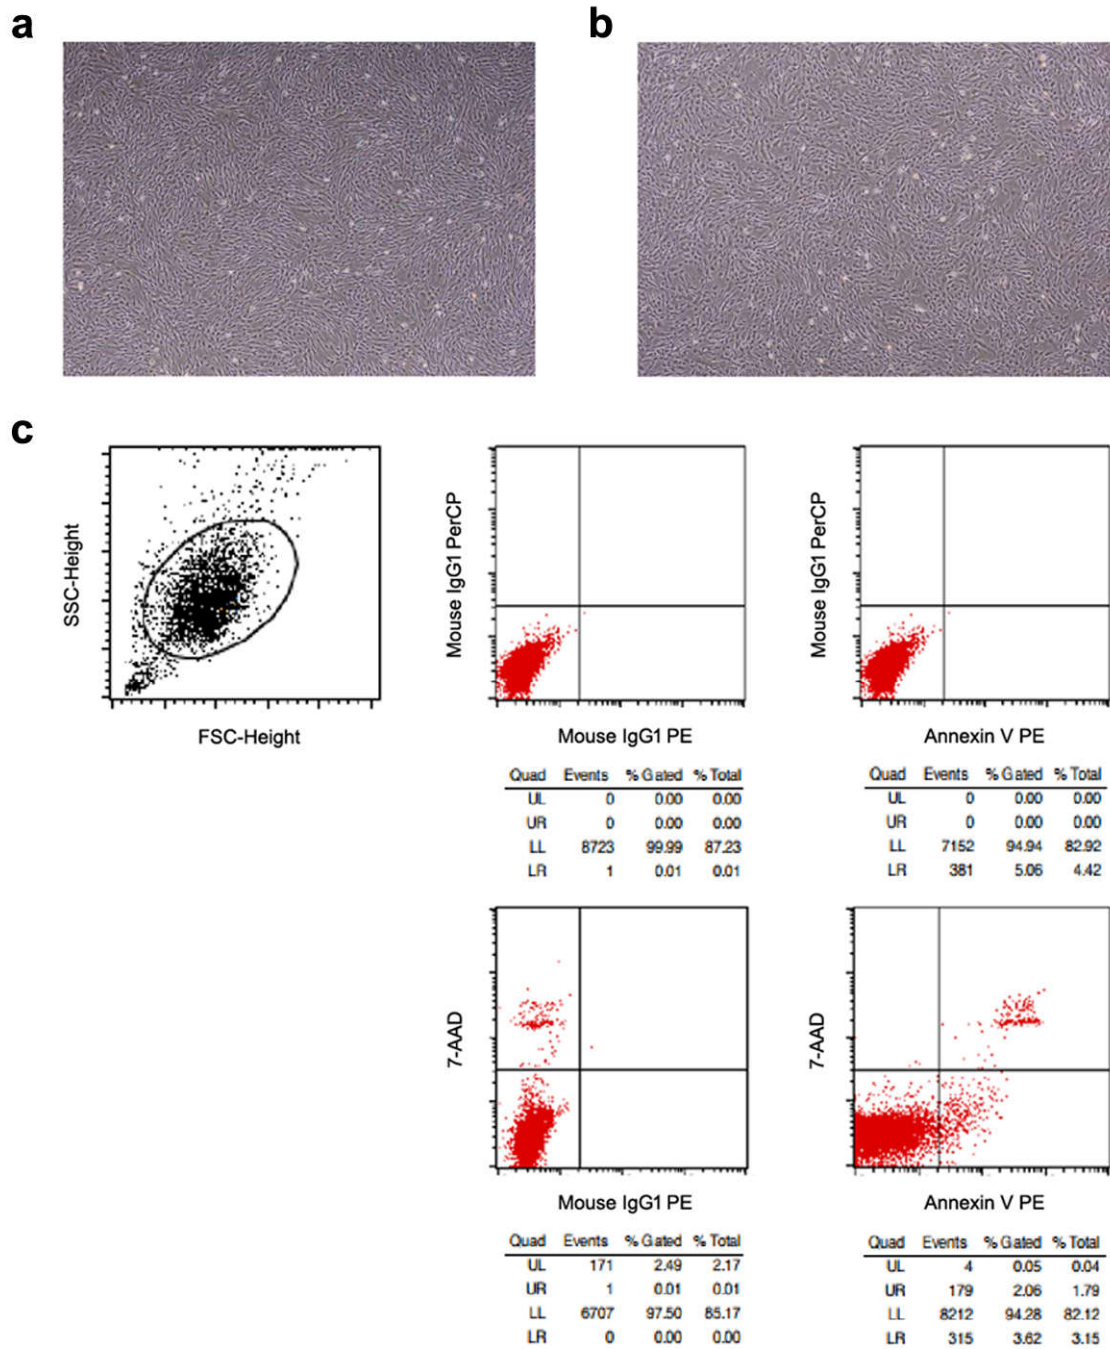

**Figure. S3.**

UC-MSCs morphology and viability.

**a,b** The UC-MSCs morphology (40 ×) and viability of working cell bank (passage 4) and final product (passage 5). **c** The apoptosis of UC-MSCs was detected using an Annexin V-/7-AAD-assay and the viability of the final product.

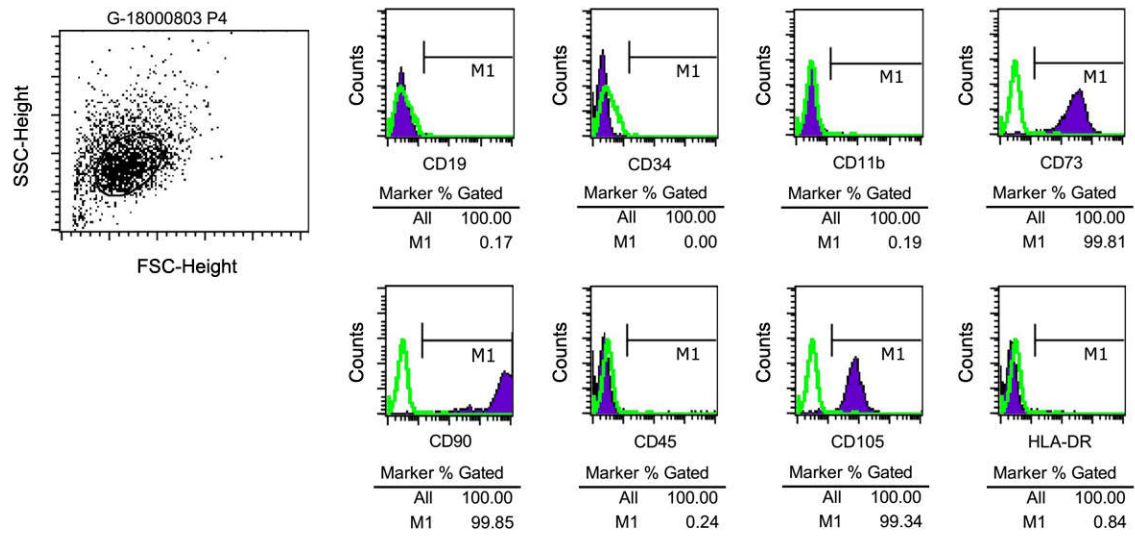

**Figure. S4.**

Surface markers of UC-MSCs.

The surface markers of UC-MSCs (passage 5) were analyzed using flow cytometry.

**Table S1.**

Details of clinical data among the patients with COVID-19 with/without UC-MSCs treatment at discharge

| <b>Table S 1.</b> Details of clinical data among the patients with COVID-19 with/without UC-MSCs treatment at discharge. |                               |      |       |       |      |       |       |       |       |                     |       |    |        |       |        |       |       |        |
|--------------------------------------------------------------------------------------------------------------------------|-------------------------------|------|-------|-------|------|-------|-------|-------|-------|---------------------|-------|----|--------|-------|--------|-------|-------|--------|
| Patient number                                                                                                           | UC-MSCs treatment group (n=9) |      |       |       |      |       |       |       |       | Control group (n=9) |       |    |        |       |        |       |       |        |
|                                                                                                                          | T1                            | T2   | T3    | T4    | T5   | T6    | T7    | T8    | T9    | C1                  | C2    | C3 | C4     | C5    | C6     | C7    | C8    | C9     |
| Mechanical ventilation (days)                                                                                            | 0                             | 0    | 0     | 0     | 0    | 1     | 0     | 0     | 0     | 0                   | 0     | 0  | 13     | 0     | 11     | 0     | 11    | 5      |
| Duration of oxygen support (days)                                                                                        |                               |      |       |       |      |       |       |       |       |                     |       |    |        |       |        |       |       |        |
| Low flow oxygen                                                                                                          | 14                            | 0    | 20    | 0     | 12   | 21    | 8     | 12    | 5     | 0                   | 0     | 7  | 10     | 16    | 18     | 22    | 13    | 1      |
| High flow oxygen                                                                                                         | 0                             | 0    | 0     | 0     | 0    | 14    | 0     | 1     | 2     | 0                   | 0     | 0  | 10     | 0     | 6      | 2     | 3     | 20     |
| Duration of clinical symptoms (days)                                                                                     |                               |      |       |       |      |       |       |       |       |                     |       |    |        |       |        |       |       |        |
| Fever                                                                                                                    | 2                             | 1    | 5     | 15    | 0    | 0     | 1     | 0     | 0     | 0                   | 4     | 0  | 0      | 0     | 0      | 3     | 0     | 0      |
| Fatigue                                                                                                                  | 2                             | 0    | 8     | 0     | 0    | 5     | 7     | 0     | 0     | 0                   | 0     | 0  | 16     | 3     | 0      | 4     | 9     | 3      |
| Cough                                                                                                                    | 5                             | 0    | 0     | 19    | 0    | 5     | 7     | 0     | 0     | 2                   | 0     | 2  | 14     | 9     | 1      | 5     | 4     | 7      |
| Shortness of breath (days)                                                                                               | 0                             | 0    | 0     | 0     | 0    | 0     | 3     | 0     | 0     | 0                   | 0     | 0  | 14     | 0     | 2      | 2     | 9     | 9      |
| Antibody at discharge (Titer of antibody, s/co)                                                                          |                               |      |       |       |      |       |       |       |       |                     |       |    |        |       |        |       |       |        |
| Titer of IgM at discharge                                                                                                | 66.75                         | 4.02 | 6.96  | 32.69 | 9.89 | 59.25 | 9.99  | 31.58 | 24.62 | /                   | 55.56 | /  | 512.78 | 19.13 | 88.79  | 3.04  | 76.89 | 187.19 |
| Titer of IgG at discharge                                                                                                | 20.56                         | 4.27 | 34.29 | 2.47  | 4.57 | 32.88 | 19.93 | 44.21 | 1.00  | /                   | 15.69 | /  | 19.74  | 21.5  | 121.11 | 13.47 | 97.69 | 122.79 |
| Interval between admission and discharge (days)                                                                          | 19                            | 15   | 20    | 17    | 26   | 37    | 18    | 20    | 23    | 16                  | 24    | 19 | 21     | 23    | 30     | 23    | 34    | 22     |
